# Supplementary material for: Microbiota in the apical root canal system of tooth with apical periodontitis
Source: BMC Genomics. 2019 Apr 4;20(Suppl 2):189. doi: 10.1186/s12864-019-5474-y (PMC6456935; doi:10.1186/s12864-019-5474-y)
Supplement: Supplementary file 4 — Clinical information of all the 50 samples. (XLSX 15 kb) [file 12864_2019_5474_MOESM4_ESM.xlsx]

## Sheet: clinical_Information_complete_f
PatientID	SampleID	Gender	Age	Smoking?	Alcohol?	SystemicDisease?	Location	AP?	RCT?	Lesion	Levels_Lesion	Group
Txp	T_D_None_A.Txp	Female	68	No	Yes	coronary heart disease	Tooth Root Apex	AP	Yes		LSA	RCT
4	T_D_RCT.4	Male	21	No	No	None	Tooth Root Apex	AP	Yes	4×4mm	SSA	RCT
6	T_D_RCT.6	Female	53	No	No	None	Tooth Root Apex	AP	Yes	3×3mm	SSA	RCT
10	T_D_RCT.10	Female	46	No	No	None	Tooth Root Apex	AP	Yes	2×3mm	SSA	RCT
11	T_D_RCT.11	Female	42	No	No	None	Tooth Root Apex	AP	Yes	4×4mm	SSA	RCT
17	T_D_RCT.17	Female	51	No	No	None	Tooth Root Apex	AP	Yes	2×2mm	SSA	RCT
18	T_D_RCT.18	Female	27	No	No	None	Tooth Root Apex	AP	Yes	3×3mm	SSA	RCT
Jm	T_D_RCT.Jm	Male	41	No	No	None	Tooth Root Apex	AP	Yes		SSA	RCT
28	T_D_None_A.28	Male	59	No	No	colorectal cancer	Tooth Root Apex	AP	No	6×3mm	LSA	NRCT
1	T_D_None_B.1	Female	74	No	No	hypertensive disease	Tooth Root Apex	AP	No	3×3mm	SSA	NRCT
3	T_D_None_A.3	Male	72	No	No	hypertensive disease	Tooth Root Apex	AP	No	2×3mm	SSA	NRCT
9	T_D_None_A.9	Female	73	No	No	hypertensive disease	Tooth Root Apex	AP	No	4×5mm	SSA	NRCT
22	T_D_None_B.22	Male	79	No	No	hypertensive disease	Tooth Root Apex	AP	No	4×4mm	SSA	NRCT
23	T_D_None_B.23	Female	62	No	No	hypertensive disease	Tooth Root Apex	AP	No	2×2mm	SSA	NRCT
25	T_D_None_A.25	Male	65	No	No	hypertensive disease	Tooth Root Apex	AP	No	3×2mm	SSA	NRCT
13	T_D_None_A.13	Male	83	No	No	coronary heart disease	Tooth Root Apex	AP	No	6×7mm	LSA	NRCT
2	T_D_None_B.2	Female	41	No	No	None	Tooth Root Apex	AP	No	3×2mm	SSA	NRCT
5	T_D_None_A.5	Male	41	No	No	None	Tooth Root Apex	AP	No	8×5mm	LSA	NRCT
7	T_D_None_B.7	Female	62	No	No	None	Tooth Root Apex	AP	No	4×3mm	SSA	NRCT
8	T_D_None_A.8	Female	52	No	No	None	Tooth Root Apex	AP	No	6×5mm	LSA	NRCT
12	T_D_None_A.12	Female	29	No	No	None	Tooth Root Apex	AP	No	6×4mm	LSA	NRCT
14	T_D_None_A.14	Male	45	No	No	None	Tooth Root Apex	AP	No	4×3mm	SSA	NRCT
15	T_D_None_B.15	Female	52	No	No	None	Tooth Root Apex	AP	No	3×2mm	SSA	NRCT
19	T_D_None_A.19	Female	61	No	No	None	Tooth Root Apex	AP	No	5×6mm	LSA	NRCT
21	T_D_None_B.21	Female	34	No	No	None	Tooth Root Apex	AP	No	4×4mm	SSA	NRCT
24	T_D_None_B.24	Male	74	No	No	None	Tooth Root Apex	AP	No	2×2mm	SSA	NRCT
26	T_D_None_A.26	Male	28	No	No	None	Tooth Root Apex	AP	No	3×4mm	SSA	NRCT
27	T_D_None_B.27	Female	72	No	No	None	Tooth Root Apex	AP	No	3×3mm	SSA	NRCT
29	T_D_None_A.29	Male	34	No	No	None	Tooth Root Apex	AP	No	6×5mm	LSA	NRCT
30	T_D_None_B.30	Female	62	No	No	None	Tooth Root Apex	AP	No	3×3mm	SSA	NRCT
Xy	T_D_None_A.Xy	Female	42	No	Yes	None	Tooth Root Apex	AP	No	8×5mm	LSA	NRCT
37	T_H_None.37	Male	19			None	Tooth Root Apex	Healthy	No			HT
38	T_H_None.38	Male	19			None	Tooth Root Apex	Healthy	No			HT
Ql	T_H_None.Ql	Female	35	No	No	None	Tooth Root Apex	Healthy	No			HT
L4	T_H_None.L4						Tooth Root Apex	Healthy	No			HT
L5	T_H_None.L5						Tooth Root Apex	Healthy	No			HT
L6	T_H_None.L6						Tooth Root Apex	Healthy	No			HT
L7	T_H_None.L7						Tooth Root Apex	Healthy	No			HT
L8	T_H_None.L8						Tooth Root Apex	Healthy	No			HT
L9	T_H_None.L9						Tooth Root Apex	Healthy	No			HT
L10	T_H_None.L10						Tooth Root Apex	Healthy	No			HT
39	O_H_None.39	Male	19			None	Oral	Healthy	No			HO
Ql	O_H_None.Ql	Female					Oral	Healthy	No			HO
L4	O_H_None.L4						Oral	Healthy	No			HO
L5	O_H_None.L5						Oral	Healthy	No			HO
L6	O_H_None.L6						Oral	Healthy	No			HO
L7	O_H_None.L7						Oral	Healthy	No			HO
L8	O_H_None.L8						Oral	Healthy	No			HO
L9	O_H_None.L9						Oral	Healthy	No			HO
L10	O_H_None.L10						Oral	Healthy	No			HO
SSA:small lesion area; LSA: Large lesion area;
AP: apical perodontitis
HO: healthy oral samples; HT: healthy teeth; NRCT: AP teeth without RCT treatment; RCT: AP teeth treated by RCT.
